# Supplementary material for: Liquid Metal-Based Flexible and Wearable Sensor for Functional Human–Machine Interface
Source: Micromachines (Basel). 2022 Aug 29;13(9):1429. doi: 10.3390/mi13091429 (PMC9504365; doi:10.3390/mi13091429)
Supplement: Supplementary file 1 [file micromachines-13-01429-s001.zip]

Archive with 4 entries (4 files):
- 2.Supplementary Information.pdf
- Movie S1.Demonstrate liquid metal injection into microchannels~1.mkv
- Movie S2.Fatigue test for bending performance of the sensor.mkv
- Movie S3.The Demonstration of wireless sensor gloves controlling car movement.mkv
